# Supplementary material for: BATF2 inhibits immunopathological Th17 responses by suppressing Il23a expression during Trypanosoma cruzi infection
Source: PubMed Central journal article supplement — J Exp Med. 2017 May 1;214(5):1313–31. doi: 10.1084/jem.20161076 (PMC5413328; doi:10.1084/jem.20161076), 2017-05-01
Supplement: JEM_20161076_sm.pdf [file JEM_20161076_sm.pdf]

SUPPLEMENTAL MATERIAL

Kitada et al., <https://doi.org/10.1084/jem.20161076>

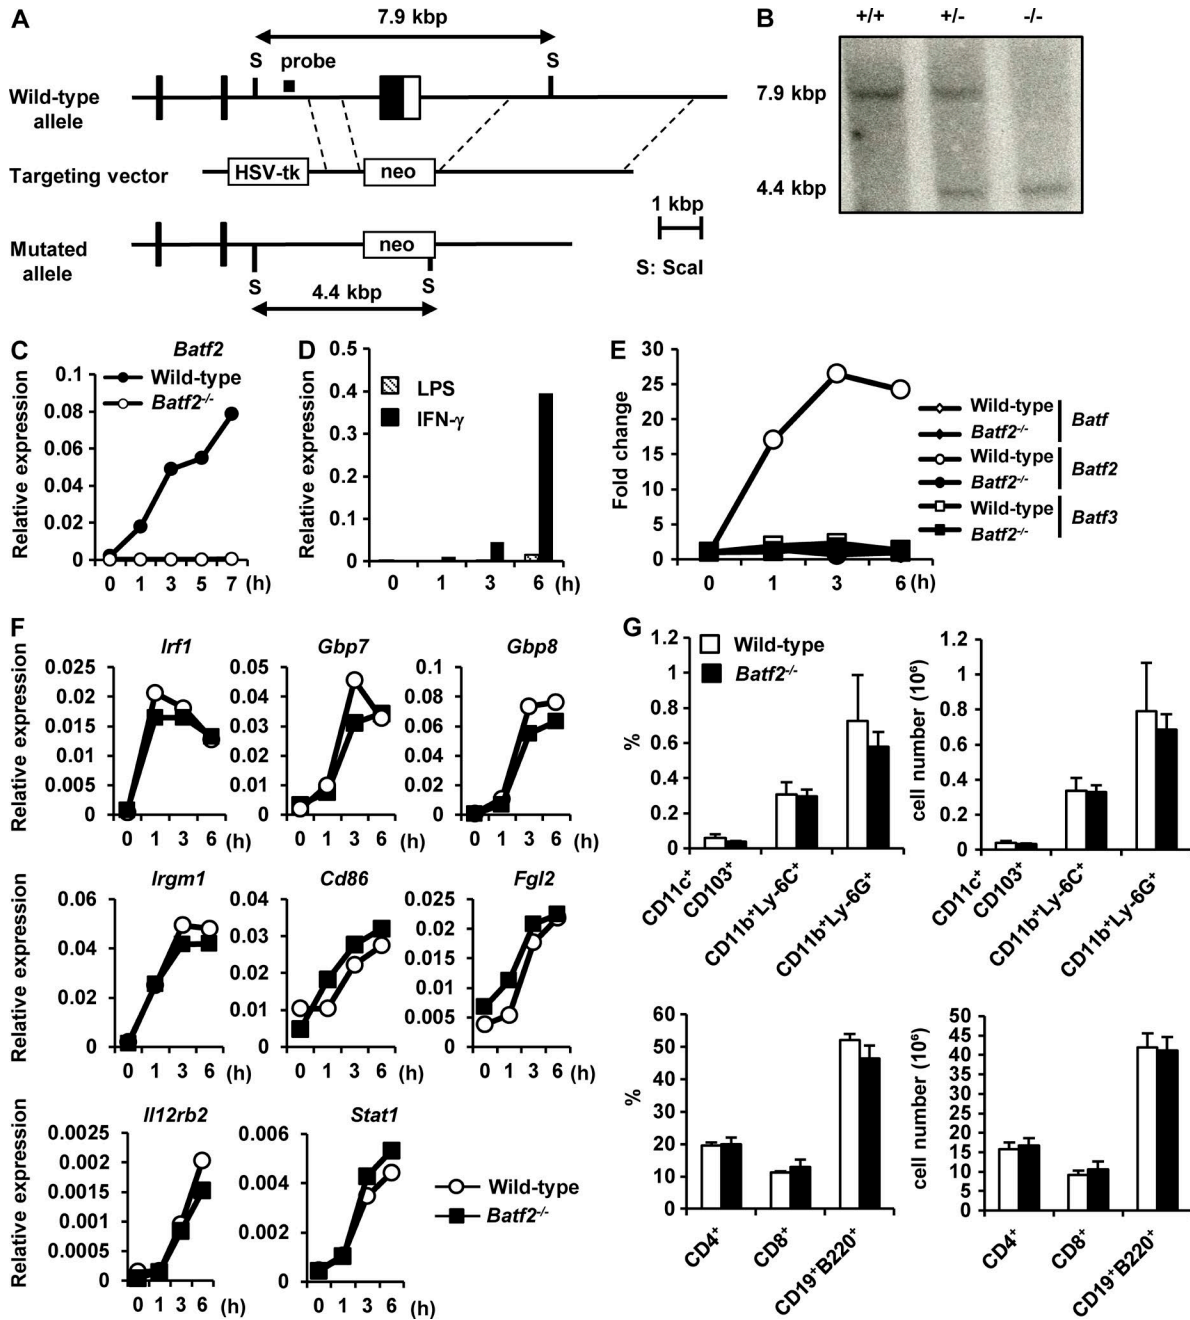

Figure S1. **Generation of *Batf2*<sup>-/-</sup> mice.** (A) Map of the *BATF2* wild-type genome, targeting vector, and predicted targeted gene. Open boxes, noncoding exons; closed boxes, coding exons; S, Scal. (B) Southern blot analysis of offspring from heterozygote intercrosses. Genomic DNA from the mouse tails was digested with *Scal*, separated electrophoretically, and then hybridized with the probe indicated in A. Proximal size of the wild-type band is 7.9 kbp; of the mutated band is, 4.4 kbp. (C) BMM $\phi$ s were stimulated with or without 100 ng/ml LPS plus 10 ng/ml IFN- $\gamma$  for the indicated periods and then analyzed for the expression of *BATF2* mRNA with real-time RT-PCR. The data are representative of two independent experiments. (D) BMM $\phi$ s were stimulated with or without either LPS or IFN- $\gamma$  and analyzed for expression of *BATF2* mRNA after the indicated periods. Data are representative of two independent experiments. (E) Expression of *Batf*, *Batf2*, and *Batf3* in wild-type and *Batf2*<sup>-/-</sup> BMM $\phi$ s stimulated with IFN- $\gamma$  for the indicated periods. Data are representative of two independent experiments. (F) Expression of a subset of IFN- $\gamma$ -dependent genes in wild-type and *Batf2*<sup>-/-</sup> BMM $\phi$ s stimulated with IFN- $\gamma$  for the indicated periods. All the data are representative of at least two independent experiments. (G) Frequency (left) and number (right) of innate immune cell subsets, including CD11c<sup>+</sup> CD103<sup>+</sup>, CD11b<sup>+</sup> Ly-6G<sup>+</sup>, and CD11b<sup>+</sup> Ly-6C<sup>+</sup> and lymphocytes, including CD3<sup>+</sup> CD4<sup>+</sup>, CD3<sup>+</sup> CD8<sup>+</sup>, and CD19<sup>+</sup> B220<sup>+</sup> in the spleens from wild-type ( $n = 4$ ) and *Batf2*<sup>-/-</sup> ( $n = 3$ ) mice (mean values  $\pm$  SD).

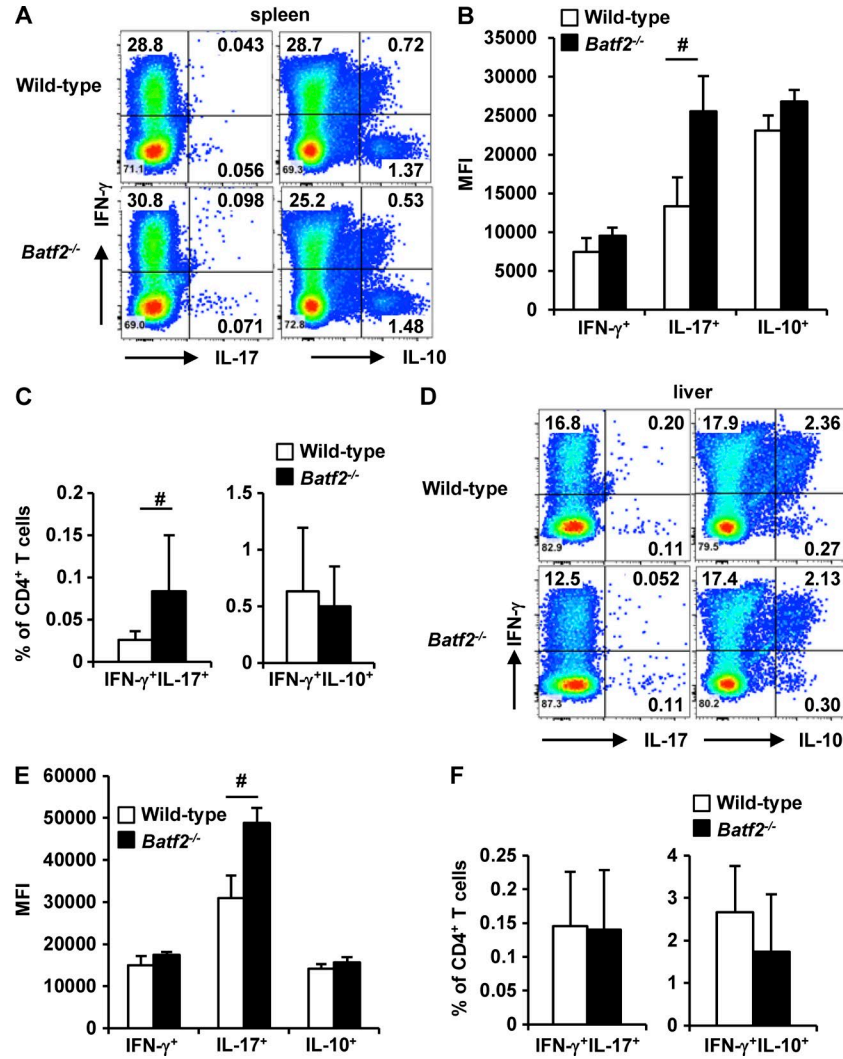

Figure S2. Increased production of IL-17, but not IL-10 and IFN- $\gamma$ , in CD4<sup>+</sup> T cells in *T. cruzi*-infected *Batf2*<sup>-/-</sup> mice. Wild-type ( $n = 6$ ) and *Batf2*<sup>-/-</sup> ( $n = 6$ ) mice were infected with *T. cruzi* for 20 d, and the spleens and livers were collected. (A and D) Flow cytometric blot of IFN- $\gamma$ , IL-17, and IL-10-producing CD4<sup>+</sup> T cells from the spleens (A) and livers (D). Data are representative of six independent experiments. (B and E) Mean fluorescence intensity (MFI) of IFN- $\gamma$ , IL-17, and IL-10 in CD4<sup>+</sup> T cells from the spleens (B) and livers (E). Data show mean values  $\pm$  SEM. #,  $P < 0.05$ . (C and F) Frequency of IFN- $\gamma$ <sup>+</sup> IL-17<sup>+</sup> and IFN- $\gamma$ <sup>+</sup> IL-10<sup>+</sup> cells among CD4<sup>+</sup> T cells from the spleens (C) and livers (F). Data are mean values  $\pm$  SD. #,  $P < 0.05$ .

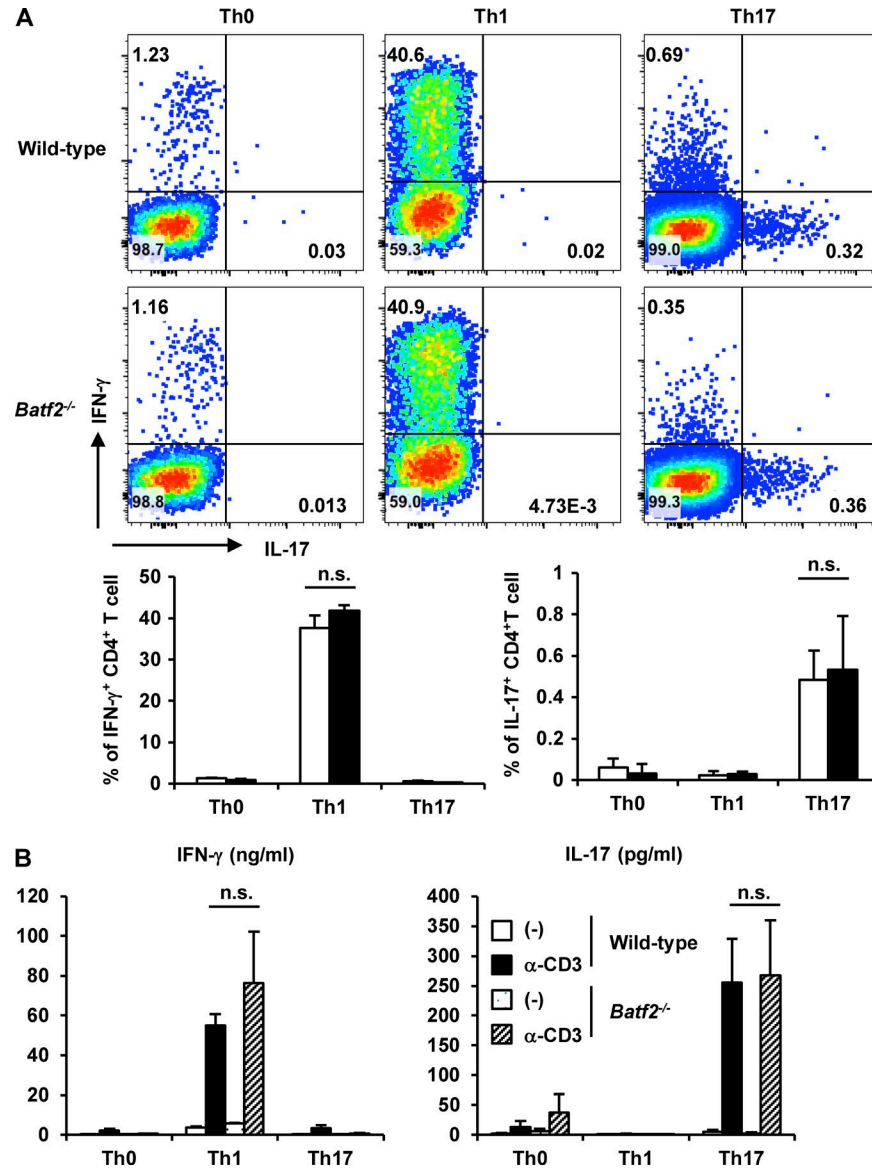

Figure S3. Normal Th1 and Th17 cell differentiation of *Batf2*<sup>-/-</sup> CD4<sup>+</sup> T cells. Naive wild-type and *Batf2*<sup>-/-</sup> CD4<sup>+</sup> T cells isolated from the spleen were cultured under Th0, Th1, and Th17 conditions for 4 d. (A) Flow cytometric plots of IFN-γ<sup>+</sup> and IL-17A-producing CD4<sup>+</sup> T cells (top). Frequency of IFN-γ<sup>+</sup> and IL-17A-producing CD4<sup>+</sup> T cells (bottom). (B) CD4<sup>+</sup> T cells cultured under Th0, Th1, and Th17 conditions for 4 d were stimulated with anti-CD3 antibody for 24 h. The culture supernatants were analyzed for IFN-γ and IL-17 with ELISA. n.s., not significant. Graphs show mean values ± SEM from three independent experiments.

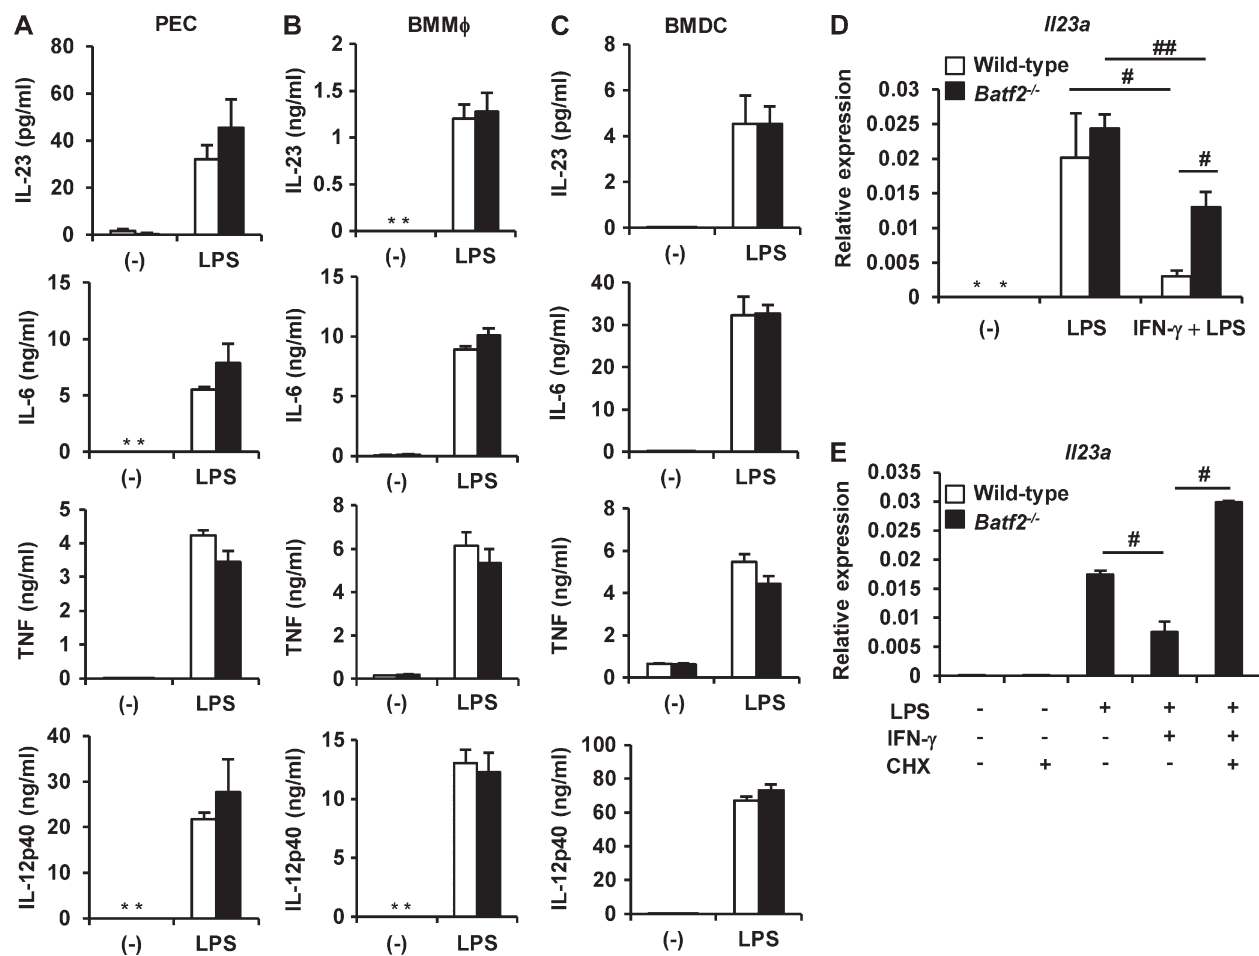

Figure S4. **IFN- $\gamma$ -induced BATF2 suppressed *I/23a* expression induced by LPS.** (A-C) Wild-type and *Batf2*<sup>-/-</sup> PECs (A), BMMφs (B), and BMDCs (C) were stimulated with LPS for 24 h. The culture supernatants were analyzed for production of IL-6, IL-23, IL-12p40, and TNF. Data are mean  $\pm$  SEM from three independent experiments. \*, not detected. (D) Wild-type and *Batf2*<sup>-/-</sup> BMMφs pretreated with or without IFN- $\gamma$  for 4 h were stimulated with LPS for 3 h, and expression of *I/23a* was analyzed. Graph shows the mean values  $\pm$  SD of triplicate PCRs on identical samples. Data are representative of two independent experiments. #,  $P < 0.03$ ; ##,  $P < 0.05$ ; \*, not detected. (E) BMMφs prepared from wild-type and *Batf2*<sup>-/-</sup> mice were treated with IFN- $\gamma$  in the presence or absence of 1 mg/ml CHX for 4 h and then stimulated with LPS. After 3 h, expression of *I/23a* was analyzed (mean values  $\pm$  SD). Representative results for three independent experiments are shown. #,  $P < 0.001$ .

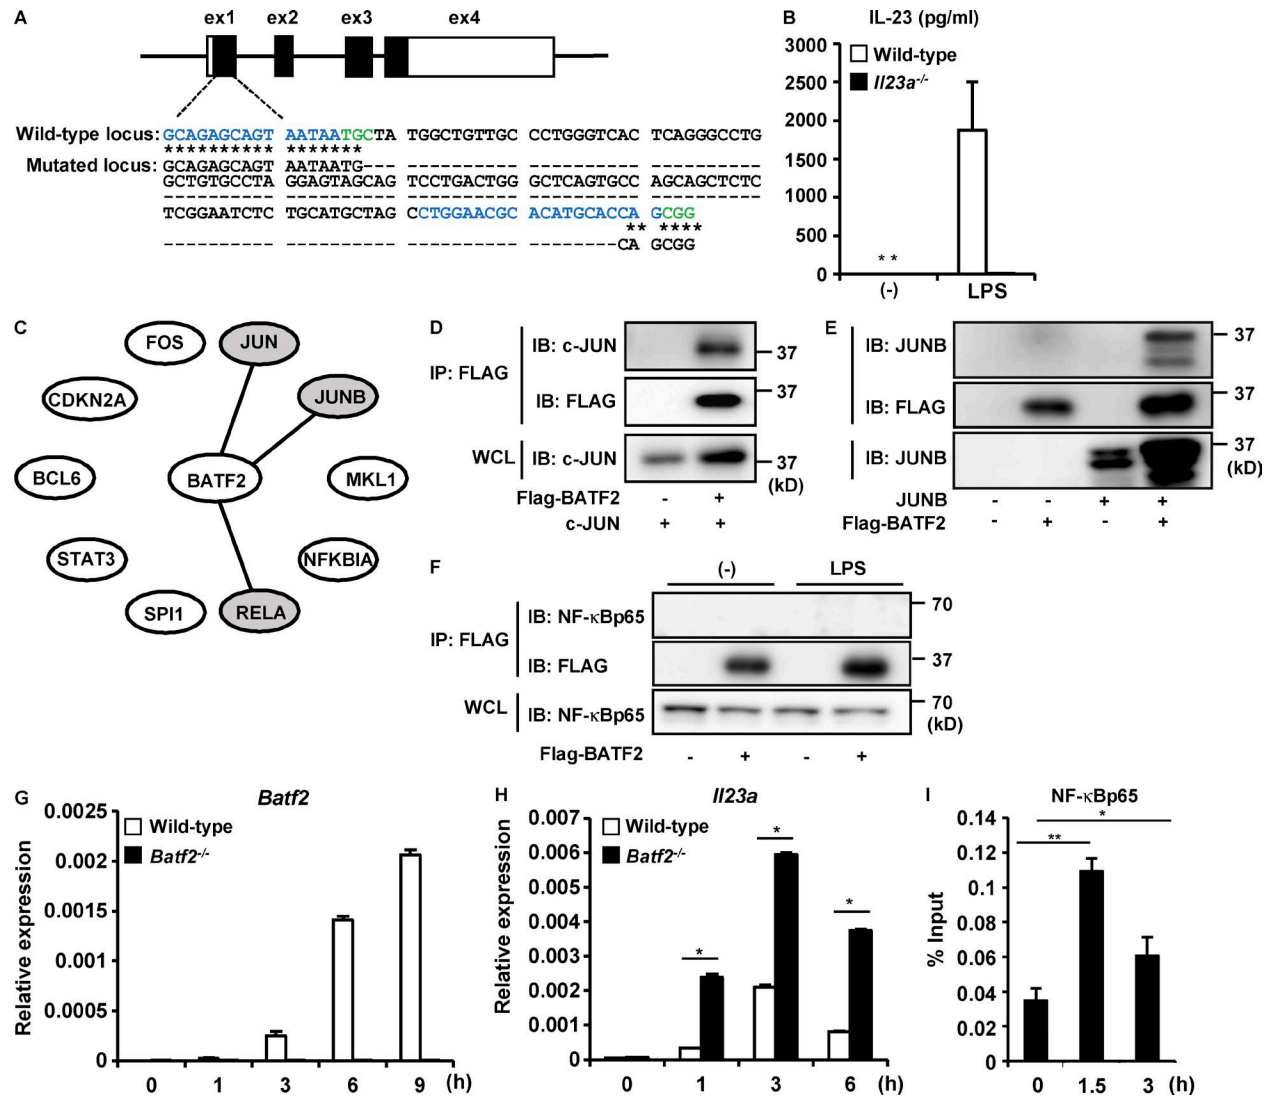

Figure S5. **BATF2-mediated down-regulation of *I/23a* expression through its interaction with c-JUN.** (A) Scheme of the Cas9/gRNA-targeting site in the first exon (ex1) of *I/23a* gene. (Top) Structure of the *I/23a* gene. Black boxes, coding exons; white boxes, noncoding exons. (Bottom) The sequence of wild type and the mutated allele. Light blue, sgRNA targeting sequence; green, PAM; black dashes, identified mutation. (B) BMMφs prepared from wild-type and *I/23a*<sup>-/-</sup> mice were stimulated with or without LPS. After 24 h, culture supernatants were analyzed for IL-23 by ELISA. Data are representative of two independent experiments (mean values ± SEM). \*, not detected. (C) Binding partners of BATF2 predicted with IPA. (D–F) HEK293 cells were cotransfected with the Flag-BATF2 expression vector and the c-JUN (D) or JUNB (E) expression vector. TLR4-expressing HEK293 cells were transfected with Flag-BATF2 and stimulated with LPS for 4 h, 24 h after transfection (F). Total cell lysates were used for coimmunoprecipitation analysis, using anti-Flag antibody for immunoprecipitation (IP) and the indicated antibodies for immunoblotting (IB). All data are representative of three independent experiments. WCL, whole cell lysate. (G and H) Wild-type and *Batf2*<sup>-/-</sup> MEFs were stimulated with LPS for the indicated periods after treatment with IFN-γ and then analyzed for expression of *Batf2* (G) and *I/23a* (H). \*, P < 0.02. Mean values ± SD for triplicate PCR on identical samples. Data are representative of at least two independent experiments. (I) Wild-type MEFs pretreated with IFN-γ were stimulated with LPS for the indicated periods, and ChIP assay was performed with anti-NF-κBp65 antibody. NF-κB-binding site in the *I/23a* promoter was analyzed in the precipitated DNA with qPCR. Means ± SD of triplicate PCRs on identical samples. Data are representative of three independent experiments. \*, P < 0.003; \*\*, P < 0.0001.

Table S1, included in a separate Excel file, lists genes upregulated in response to LPS in *Batf2*<sup>-/-</sup> BMMφs pretreated with IFN-γ.
